# Supplementary material for: Controlled catch and release of small molecules with cucurbit[6]uril via a kinetic trap
Source: Royal Society of Chemistry journal article supplement (doi:10.1039/b903033f), 2009-01-01
Supplement: b903033f.pdf [file b903033f.pdf]

# Controlled catch and release of small molecules with cucurbit[6]uril *via* a kinetic trap

Li Liu, Nicolas Nouvel, and Oren A. Scherman\*

*Melville Laboratory for Polymer Synthesis, Department of Chemistry, University of Cambridge,  
Cambridge, CB3 9BB, United Kingdom.*

E-mail: oas23@cam.ac.uk

## Supporting information

**General Methods.** <sup>1</sup>H NMR spectra were recorded on Bruker Avance 500 BB-ATM (500 MHz) spectrometer. The crystallographic data was collected with a Nonius Kappa CCD diffractometer. Cucurbit[6]uril was synthesized by the reported method.<sup>1</sup> Et<sub>2</sub>O purum grade was purchased from Sigma-Aldrich and used as received. The ionic liquid samples were generously provided by Professor Steven Ley's lab, Cambridge.

**Crystallization procedure.** An aqueous solution of CB[6] and 1,3-dimethyl-1*H*-imidazol-3-ium methylsulfonate (**1**) was prepared with a slight excess of CB[6]. The solution was stirred for 2 hours at room temperature and was let overnight to decant. The following day, 1 to 2 ml of the clear and saturated solution of CB[6] with **1** was transferred into a 3 ml sample vial which was without its lid and transferred into a larger vial containing Et<sub>2</sub>O. The larger vial was then sealed and crystallization occurs within a week in the small vial as Et<sub>2</sub>O continuously diffuses from the large

to the small vial.

## References

- (1) Buschmann, H.; Fink, H.; Schollmeyer, E. *DE19603377* **1996**.
